# Supplementary material
Source: publisher site journal article supplement (https://www.dovepress.com/article/313339)
Supplement: Supplementary file 1 [file get_supplementary_file.php]

**Smart polymeric nanoparticles with pH-responsive and PEG-detachable properties (II): co-deliver of paclitaxel and VEGF siRNA for synergistic breast cancer therapy in mice**

Mingji Jin1,2,#, Yan Hou1,2,3,#, Xiuquan Quan1,2,4,#, Liqing Chen1,2, Zhonggao Gao1,2,*, Wei Huang1,2,*

1 State Key Laboratory of Bioactive Substance and Function of Natural Medicines, Institute of Materia Medica, Chinese Academy of Medical Sciences and Peking Union Medical College, Beijing 100050, China

2 Beijing Key Laboratory of Drug Delivery Technology and Novel Formulations, Institute of Materia Medica, Chinese Academy of Medical Sciences and Peking Union Medical College, Beijing 100050, China

3 Department of Pharmacy, Yanbian University, Yanji Jilin 133000, P.R. China

4 Department of Emergency Medicine, Affiliated Hospital of Yanbian University, Yanji Jilin 133000, P.R. China

* Corresponding authors: Zhonggao Gao, [zggao@imm.ac.cn](mailto:zggao@imm.ac.cn), Tel.: +86 010 63028096. Wei Huang, [huangwei@imm.ac.cn](mailto:huangwei@imm.ac.cn), Tel.: +86 010 63026505

# These authors contributed equally to this work.


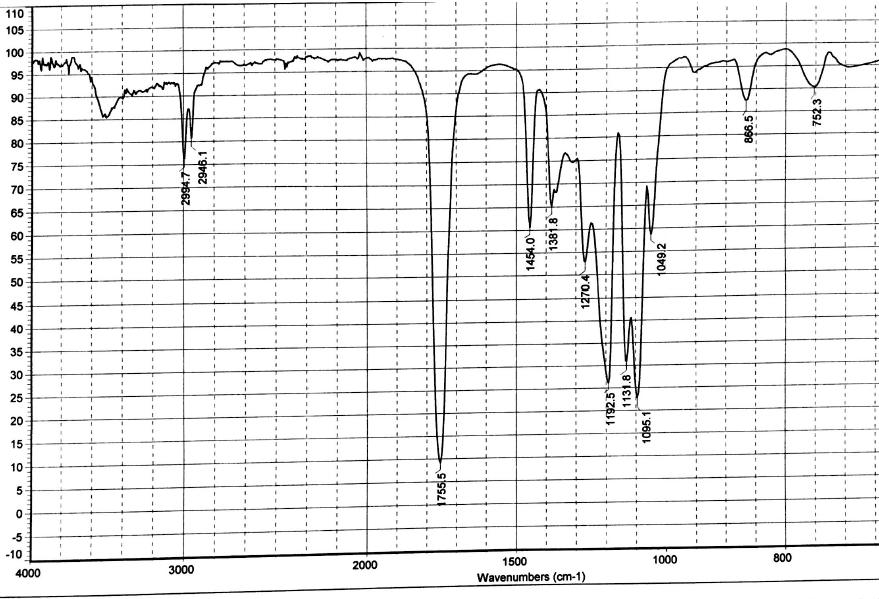


Figure S1. FTIR spectra of PLA-COOH.


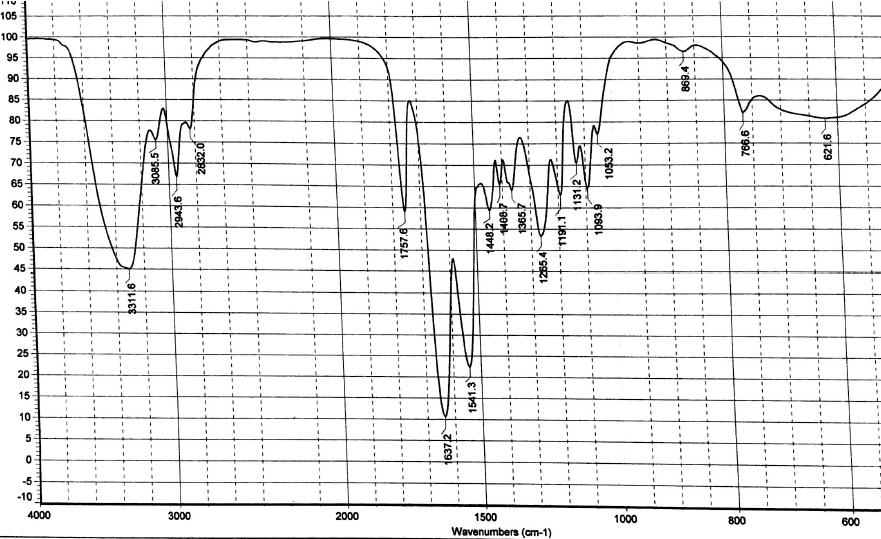


Figure S2. FTIR spectra of PEI-PLA.

As shown in the figures, strong absorption appears at 1755 cm-1 in the FTIR of PLA-COOH, which is attributed to the stretching vibration absorption peak (VC =O) of the carboxyl group in PLA-COOH. In PEI-PLA, strong absorption appeared at 3300 cm-1 and 1540-1640 cm-1, of which 3300 cm-1 was attributed to the absorption peak of amino on PEI, and 1540-1640 cm-1 was attributed to the characteristic absorption peak of C=O stretching vibration in the amide bond.
